# Supplementary material
Source: PubMed Central journal article supplement (PMC3035068)
Supplement: blood-2010-01-264507_1.pdf [file blood-2010-01-264507_1.pdf]

**Table S1. VWD patient phenotypes**

The parameters defining the clinical and laboratory phenotypes of the patients studied in Fig 5 are shown. The symbols correspond to those in Fig. 5.

**Figure S1. VWF specific siRNA reduces VWF expression in HUVEC**

Confocal microscopy of control or siVWF-treated HUVEC stained for VWF (Top panels) and nuclei (Bottom panels) (representative images at 48 hour post siRNA) (Size bar = 20  $\mu$ m).

**Figure S2. VWF specific siRNA does not significantly alter protein expression of  $\alpha$ v or  $\beta$ 1 integrins in HUVEC**

Total (a)  $\alpha$ v or (b)  $\beta$ 1 integrin protein expression was measured by western blotting at 24 and 48 hour post siRNA treatment. (n=3) Open bars = siCTL, Closed bars = siVWF treated HUVEC.

| Sample | Age | VWD type | Sex | VWF:RCo (IU/dL) | VWF:Ag (IU/dL) | Symbol |
|--------|-----|----------|-----|-----------------|----------------|--------|
| 1      | 41  | 1        | F   | <10             | 13             | ●      |
| 2      | 61  | 1        | F   | 10              | 13             | ★      |
| 3      | 58  | 1        | M   | <13             | 7              | ■      |
| 4      | 44  | 1        | F   | 29              | 39             | ✱      |
| 5      | 49  | 2M       | F   | <10             | 26             | △      |
| 6      | 27  | 2M       | M   | 12              | 30             | ◇      |
| 7      | 30  | 2M       | F   | 12              | 35             | □      |
| 8      | 85  | 2A       | M   | <10             | 21             | ⊙      |
| 9      | 28  | 2A       | M   | 20              | 35             | ▣      |

Table S1

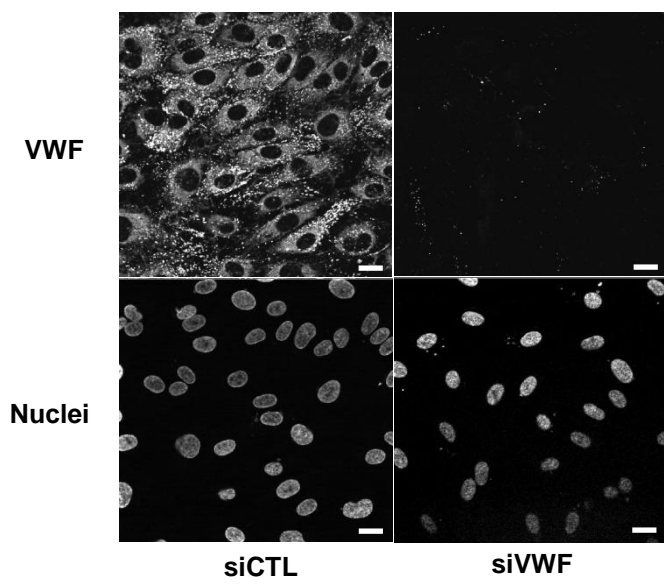

Figure S1

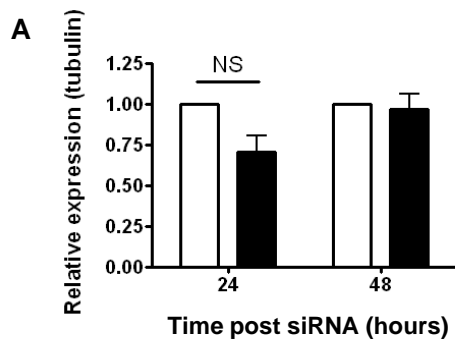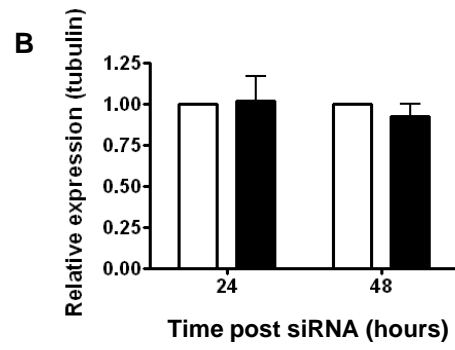

Figure S2
